# Supplementary material
Source: HighWire-hosted journal article supplement (https://thorax.bmj.com/content/72/6/498.1)
Supplement: inline-supplementary-material-1 [file inline-supplementary-material-1.pdf]

**Parts of the survey questionnaire relevant to this manuscript**

**Study Subject ID.....**

**Part one: Survey of general information and potential confounding factors**

Q1. Farming system / Working area ?

|                       |  |
|-----------------------|--|
| Large scale closed    |  |
| Small scale irrigated |  |
| Large scale open      |  |
| Small scale rain fed  |  |
| Office and others     |  |

Q2. What is your sex?

|        |  |
|--------|--|
| Female |  |
| Male   |  |

Q3. How old are you?

.....

Q4. The highest education level you have attended?

|                                        |  |
|----------------------------------------|--|
| No formal education                    |  |
| Elementary education(Grade 1-6)        |  |
| Primary secondary education(Grade 7-8) |  |
| Senior Secondary education(Grade 9-12) |  |
| Diploma level                          |  |
| First degree level                     |  |

Q5. What is your monthly income? (In Ethiopian Birr) .....

Q6. Have you / your family ever been under any of the food security projects?

|     |  |
|-----|--|
| Yes |  |
| No  |  |

Q7. What is your current marital status?

|          |  |
|----------|--|
| Married  |  |
| Divorced |  |
| Widowed  |  |
| Single   |  |

Q8. Have you ever use alcoholic beverages?

|     |  |
|-----|--|
| Yes |  |
| No  |  |

Q 9. Do you currently use alcoholic beverages?

|     |  |
|-----|--|
| Yes |  |
| No  |  |

Q10. Have you ever smoked cigarettes?

|     |  |
|-----|--|
| Yes |  |
| No  |  |

Q11. Do you currently smoke cigarettes? (If yes go to 12 and 13, if no go to 14 and 15)

|     |  |
|-----|--|
| Yes |  |
| No  |  |

Q12. For how long do you smoke cigarettes?

..... (Years)

Q13 How many cigarettes/pack of cigarette do you smoke per day?

.....

Q14. If you quit smoking now but smoked in the past how long did you smoke cigarettes before you quit?

..... (Years)

Q15 How many cigarettes /pack of cigarettes did you smoked in the past, per day?

.....

Q16 Do you share your bed room with someone smoking?

|     |  |
|-----|--|
| Yes |  |
| No  |  |

Q17 what fuel is used most for cooking in your home?

| <b>Fuel</b>        | yes | no |
|--------------------|-----|----|
| Coal               |     |    |
| Wood               |     |    |
| Fuel oil, kerosene |     |    |
| Electricity        |     |    |
| Any other          |     |    |

Q18 Have you ever chew *khat*?

|     |  |
|-----|--|
| Yes |  |
| No  |  |

Q19 Do you currently chew *khat*?

|     |  |
|-----|--|
| Yes |  |
| No  |  |

Q20. Have you ever use cannabis?

|     |  |
|-----|--|
| Yes |  |
| No  |  |

Q21. Do you currently use cannabis?

|     |  |
|-----|--|
| Yes |  |
| No  |  |

Q22. How do you describe your current health situation?

|           |  |
|-----------|--|
| Excellent |  |
| Very good |  |
| Fair      |  |
| Poor      |  |
| Very poor |  |

Q 23 Have you ever diagnosed with the following disease condition (s)?

| <b>Disease condition</b> | <b>Yes</b> | <b>No</b> | <b>Year of diagnosis</b> |
|--------------------------|------------|-----------|--------------------------|
| Psychiatric illness      |            |           |                          |
| Head injury/loss of      |            |           |                          |

|                                                  |  |  |  |
|--------------------------------------------------|--|--|--|
| consequesness                                    |  |  |  |
| Epilepsy                                         |  |  |  |
| Pulmonary Tuberculosis                           |  |  |  |
| Pneumonia                                        |  |  |  |
| Sexually transmitted diseases(STD) e.g. Syphilis |  |  |  |
| Any other                                        |  |  |  |

Q24. Do you have one or more episodes of rhinitis in the past 12 months?

|     |  |
|-----|--|
| Yes |  |
| No  |  |

Q25. Do you have one or more episodes of Eczema in the past 12 months?

|     |   |
|-----|---|
| Yes | 1 |
| No  | 0 |

**Part Two: Survey of Health effects**

**Section one: survey of chronic respiratory symptoms**

Q26. Do you usually cough on most days for 3 consecutive months or more during the past 12 months?

|     |  |
|-----|--|
| Yes |  |
| No  |  |

Q27. Do you bring up phlegm on most days for 3 consecutive months or more during the 12 months?

|     |  |
|-----|--|
| Yes |  |
| No  |  |

Q28. Does your chest ever sound wheezy or whistling, occasionally apart from colds the 12 months?

|     |  |
|-----|--|
| Yes |  |
| No  |  |

Q29. Do you have to stop for breath when hurrying on a level ground or walking up a slight hill?

|     |  |
|-----|--|
| Yes |  |
| No  |  |

**Part Three: Survey of exposure factors**

Q30. Occupational exposure status?

|             |  |
|-------------|--|
| Exposed     |  |
| Not exposed |  |

|                      |  |
|----------------------|--|
| Direct (application) |  |
| In direct (re-entry) |  |

Q31. How long have you worked as applicator/re-entry worker in this farm? ..... (Years)

Q32. How many days (on average) do you work as applicator/re-entry worker per year? ..... (Days)

Q33. How many hours (on average) do you work as applicator/re-entry worker per day? ..... (Hours)

Q34. Which application method/s do you use? (Only applicators)

| Pesticide application method/s | Seldom | Some times | all ways |
|--------------------------------|--------|------------|----------|
|                                |        |            |          |
|                                |        |            |          |
|                                |        |            |          |

Q35. What is the farm size? ..... (Hectares).(Only applicators)

Q36. How many pesticides (liter /kg) on average do you use per each spraying day? (Only applicators) .....

|     |  |
|-----|--|
| Yes |  |
| No  |  |

Q37. Do you usually mix and then spray? (Only applicators)

Q38. Do you usually wash the spray equipment after work? (Only applicators)

|                 |  |
|-----------------|--|
| Yes, always     |  |
| Yes, some times |  |
| No              |  |

Q39. Do you usually repair spray equipment ? (Only applicators)

|                 |  |
|-----------------|--|
| Yes, always     |  |
| Yes, some times |  |
| No              |  |

Q40. Which Personal Protective Equipment(s) do you usually use while mixing /loading of pesticides? (Tell all that apply)

| PPEs             | Yes | No |
|------------------|-----|----|
| Apron            |     |    |
| Boots            |     |    |
| Gloves           |     |    |
| Face mask        |     |    |
| Goggles/Eye mask |     |    |
| Overall          |     |    |
| Air respirator   |     |    |
| Any other        |     |    |
| No PPE           |     |    |

Q41. Which Personal Protective Equipment(s) do you usually use while pesticide spraying? (Tell all that apply)

| PPEs             | Yes | No |
|------------------|-----|----|
| Apron            |     |    |
| Boots            |     |    |
| Gloves           |     |    |
| Face mask        |     |    |
| Goggles/Eye mask |     |    |
| Overall          |     |    |
| Air respirator   |     |    |

|           |  |  |
|-----------|--|--|
| Any other |  |  |
| No PPE    |  |  |

Q42. Which Personal Protective Equipment(s) do you usually use while re-entry works? (Tell all that apply)

| PPEs             | Yes | No |
|------------------|-----|----|
| Apron            |     |    |
| Boots            |     |    |
| Gloves           |     |    |
| Face mask        |     |    |
| Goggles/Eye mask |     |    |
| Overall          |     |    |
| Air respirator   |     |    |
| Any other        |     |    |
| No PPE           |     |    |

|                 |  |
|-----------------|--|
| Yes, always     |  |
| Yes, some times |  |
| Yes, seldom     |  |
| Not at all      |  |

Q43. Do you use un-fit or worn out PPEs?

Q44. Do you usually wash your hands immediately after work?

|     |  |
|-----|--|
| Yes |  |
| No  |  |

Q45. Do you usually take a bath just after work?

|     |  |
|-----|--|
| Yes |  |
| No  |  |

Q46. Anthropometric measurements

Hight (m) ..... weight (kg) .....
