# Supplementary material
Source: HighWire-hosted journal article supplement (https://thorax.bmj.com/content/72/6/498.1)
Supplement: inline-supplementary-material-3 [file inline-supplementary-material-3.pdf]

Supplementary material3. Cumulative and daily intensity of pesticide exposure and lung function among all exposed workers, male applicators, and female re-entry workers. Effects are presented as a change in continuous measured lung function parameter of FEV1 / FVC.

| Respiratory parameters |                                | FEV1 / FVC                  |
|------------------------|--------------------------------|-----------------------------|
|                        |                                | $\beta$ 95% CI              |
| Cumulative exposure    | <b>Exposure status</b>         |                             |
|                        | unexposed (n=157)              | N.A.                        |
|                        | Exposed (n=159)                | <b>-0.03*** -0.04_-0.01</b> |
|                        | <b>Male applicators</b>        |                             |
|                        | unexposed (n=102)              | 1.00                        |
|                        | < median (n=46)                | <b>-0.04** -0.06_-0.02</b>  |
|                        | $\geq$ median (n=57)           | <b>-0.03** -0.04_-0.01</b>  |
|                        | <b>Female re-entry workers</b> |                             |
|                        | unexposed (n=55)               | 1.00                        |
|                        | < median (n=29)                | <b>-0.03 -0.52_-0.01</b>    |
|                        | $\geq$ median (n=27)           | -0.01 -0.04_ 0.01           |
| Daily exposure         | <b>Male applicators</b>        |                             |
|                        | unexposed (n=102)              | 1.00                        |
|                        | < median (n=46)                | <b>-0.03** -0.05_-0.01</b>  |
|                        | $\geq$ median (n=57)           | <b>-0.03** -0.05_-0.01</b>  |
|                        | <b>Female re-entry workers</b> |                             |
|                        | unexposed (n=55)               | 1.00                        |
|                        | < median (n=29)                | -0.02 -0.04_0.01            |
| $\geq$ median (n=27)   | -0.02 -0.05_0.004              |                             |

\*=p<0.05 \*\*p<0.01 \*\*\*P<0.001

#The ( $\beta$ ) values were adjusted for gender (where relevant), age, bmi, smoking status, ever pneumonia, and income, marital and *Khat* chewing status
